# Supplementary material
Source: PubMed Central journal article supplement (PMC7118922)
Supplement: mmc1.pdf [file mmc1.pdf]

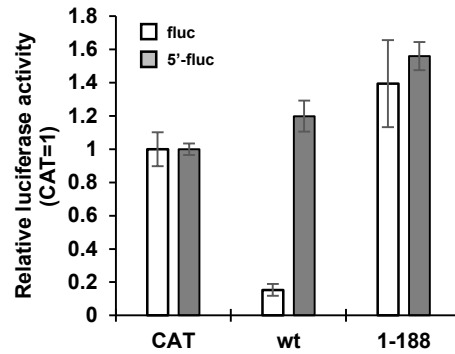

**Supplemental figure 1.**

C-terminal deletion mutant completely lost its activity of translational shutoff. Luciferase activities in 293T cells transfected with either pcD-fluc or pcD-5'-fluc together with the nsp1 deletion mutant, pCAG-nsp1-1-188 were determined at 24 h posttransfection after standardization with those in cells expressing CAT. The values represent the means  $\pm$  SD from three independent experiments.
